# Supplementary material
Source: ML conference proceedings conference paper supplement (https://openreview.net/forum?id=nNsZxc2cmO)
Supplement: supplementary_material [file attachment]

## 459 A Few-Shot Prompt

460 We use the few-shot prompt shown in Listing 1 for the *3DOC* experiments in Section 5.2. The prompt uses  
 461 Python syntax, and begins with an “import” statement that indicates functions available from the fine-grained  
 462 object localization API (Section 4.2). Users queries are converted to lower case, the ending punctuation is  
 463 removed, and prepended with a # (which represents a comment in Python). Then, the preprocessed query  
 464 is added to the few-shot prompt after an empty line. The modified prompt is then processed with an LLM.  
 465 For multi-round dialog, additional interactions or corrections are added after the response from the LLM  
 466 without an empty line separator (as demonstrated in the second and third few-shot examples).

```

467 from utils import find_objects, sort_objects, is_close
468
469 # find the wooden chair
470 def go_find_it():
471     chairs =
472         find_objects('chair', distractors=['sofa', 'bench', 'stool', 'desk'])
473     chairs = sort_objects(chairs, attributes=['wooden'])
474     return chairs[0]
475
476 # find a backpack with white polka dots on it
477 def go_find_it():
478     backpacks
479     = find_objects('backpack', distractors=['pillow', 'jacket', 'shirt'])
480     backpacks = sort_objects(backpacks, attributes=['white polka dots'])
481     return backpacks[0]
482 # no, my backpack is also yellow
483 def go_find_it():
484     backpacks
485     = find_objects('backpack', distractors=['pillow', 'jacket', 'shirt'])
486     backpacks
487     = sort_objects(backpacks, attributes=['white polka dots', 'yellow'])
488     return backpacks[0]
489
490 # find the pants on the dresser
491 def go_find_it():
492     pants = find_objects
493         ('pants', distractors=['shirt', 'socks', 'shoes', 'dress'])
494     dressers = find_objects
495         ('dresser', distractors=['bookshelf', 'bed', 'desk', 'chair'])
496     pants = is_close(pants, dressers)
497     return pants[0]
498 # no, my pants are also red
499 def go_find_it():
500     pants = find_objects
501         ('pants', distractors=['shirt', 'socks', 'shoes', 'dress'])
502     pants = sort_objects(pants, attributes=['red'])
503     dressers = find_objects
504         ('dresser', distractors=['bookshelf', 'bed', 'desk', 'chair'])
505     pants = is_close(pants, dressers)
506     return pants[0]
507
508 # find the apple next to the microwave
509 def go_find_it():
510     apples = find_objects
511         ('apple', distractors=['pear', 'tomato', 'orange', 'bowl'])
512     microwaves = find_objects
513         ('microwave', distractors=['dishwasher', 'sink', 'refrigerator',])
514     apples = is_close(apples, microwaves)
515     return apples[0]
516

```

Listing 1: Few-shot prompt used for experiments in simulation.

Table 2: *3DOC* Statistics

|                                     |       |
|-------------------------------------|-------|
| Num of Object Categories            | 10    |
| Num of Unique Objects               | 72    |
| Num of Unique Intrinsic Attributes  | 53    |
| Num of Unique Scenes                | 100   |
| Num of Unique Scene Layouts         | 500   |
| Num of Extrinsic Attribute Episodes | 50    |
| Num of Intrinsic Attribute Episodes | 1,713 |

## 518 **B *3DOC* Statistics**

519 Table 2 provides additional details on the composition of the *3DOC* dataset.

## 520 **C Qualitative Examples**

521 A video presenting qualitative examples of our *GoFind* agent executing the *FindThis* task in both simulation  
 522 and in the real-world is provided in the supplemental material.

## 523 **D Dataset and Code Release**

524 The *3DOC* dataset and source code to reproduce the results presented in Section 5.2 will be publicly  
 525 released.
